# Supplementary material for: Investigation of Clinically Significant Molecular Aberrations in Patients with Prostate Cancer: Implications for Personalized Treatment, Prognosis and Genetic Testing
Source: MDPI journal article supplement (doi:10.3390/ijms241411834), 2023-07-23
Supplement: s1 [file s1]

| Amplicon ID    | Chromosome | Amplicon start<br>(hg19) | Amplicon end<br>(hg19) |
|----------------|------------|--------------------------|------------------------|
| AMPL7170855335 | chr1       | 27023549                 | 27023683               |
| AMPL7171869382 | chr1       | 27023900                 | 27024032               |
| AMPL7170424868 | chr1       | 27056347                 | 27056470               |
| AMPL7170424748 | chr1       | 27057708                 | 27057825               |
| AMPL7171869517 | chr1       | 27057974                 | 27058095               |
| AMPL7171812527 | chr1       | 27087479                 | 27087605               |
| AMPL7170425568 | chr1       | 27088716                 | 27088837               |
| AMPL7170424580 | chr1       | 27089633                 | 27089758               |
| AMPL7171869369 | chr1       | 27092769                 | 27092894               |
| AMPL7170623890 | chr1       | 27097584                 | 27097710               |
| AMPL7170424591 | chr1       | 27100076                 | 27100205               |
| AMPL7170425382 | chr1       | 27100176                 | 27100298               |
| AMPL7171891882 | chr1       | 27100895                 | 27101013               |
| AMPL7171902123 | chr1       | 27101008                 | 27101135               |
| AMPL7171869116 | chr1       | 27101159                 | 27101283               |
| AMPL7161412284 | chr1       | 27101327                 | 27101452               |
| AMPL7170425442 | chr1       | 27101637                 | 27101765               |
| AMPL7171869122 | chr1       | 27105627                 | 27105747               |
| AMPL7171869000 | chr1       | 27105758                 | 27105854               |
| AMPL7170086422 | chr1       | 27105861                 | 27105961               |
| AMPL7171813124 | chr1       | 27106482                 | 27106597               |
| AMPL7170424495 | chr1       | 27106531                 | 27106648               |
| AMPL7170425472 | chr1       | 27106751                 | 27106860               |
| AMPL7171869259 | chr1       | 46714181                 | 46714302               |
| AMPL7171609162 | chr1       | 46733135                 | 46733261               |
| AMPL7170596501 | chr1       | 46736350                 | 46736476               |
| AMPL7170425219 | chr1       | 46738104                 | 46738226               |
| AMPL7170582140 | chr1       | 226561953                | 226562076              |
| AMPL7171868796 | chr1       | 226574071                | 226574182              |
| AMPL7171869068 | chr1       | 226576386                | 226576513              |
| AMPL7170331871 | chr10      | 89624206                 | 89624333               |
| AMPL7170691589 | chr10      | 89624219                 | 89624353               |
| AMPL7171902011 | chr10      | 89653752                 | 89653852               |
| AMPL7170333312 | chr10      | 89653804                 | 89653910               |
| AMPL7171901954 | chr10      | 89685207                 | 89685313               |
| AMPL7170334466 | chr10      | 89685244                 | 89685359               |
| AMPL7171623896 | chr10      | 89690783                 | 89690891               |
| AMPL7171902120 | chr10      | 89692713                 | 89692831               |
| AMPL7171902129 | chr10      | 89692816                 | 89692944               |
| AMPL7171901994 | chr10      | 89692923                 | 89693038               |
| AMPL7171902060 | chr10      | 89711810                 | 89711936               |
| AMPL7170336075 | chr10      | 89711914                 | 89712036               |
| AMPL7170325896 | chr10      | 89717571                 | 89717693               |
| AMPL7171224926 | chr10      | 89717693                 | 89717798               |
| AMPL7170335369 | chr10      | 89720578                 | 89720695               |
| AMPL7170325913 | chr10      | 89720697                 | 89720812               |
| AMPL7170691519 | chr10      | 89720801                 | 89720916               |
| AMPL7171891845 | chr10      | 89720892                 | 89721003               |

|                |       |           |           |
|----------------|-------|-----------|-----------|
| AMPL7170888696 | chr10 | 89724846  | 89724922  |
| AMPL7171902062 | chr10 | 89724916  | 89725034  |
| AMPL7170328563 | chr10 | 89725017  | 89725129  |
| AMPL7170623200 | chr10 | 123239472 | 123239579 |
| AMPL7170359373 | chr10 | 123244865 | 123244961 |
| AMPL7170359546 | chr10 | 123246868 | 123246991 |
| AMPL7170623683 | chr10 | 123247444 | 123247559 |
| AMPL7170088764 | chr10 | 123255944 | 123256045 |
| AMPL7170087909 | chr10 | 123256041 | 123256144 |
| AMPL7170359421 | chr10 | 123257982 | 123258104 |
| AMPL7170361230 | chr10 | 123258041 | 123258160 |
| AMPL7170361117 | chr10 | 123263269 | 123263384 |
| AMPL7171902021 | chr10 | 123274779 | 123274901 |
| AMPL7170624415 | chr10 | 123276890 | 123277011 |
| AMPL7170325903 | chr10 | 123279413 | 123279539 |
| AMPL7170325872 | chr10 | 123279606 | 123279714 |
| AMPL7170623674 | chr10 | 123298138 | 123298265 |
| AMPL7171137459 | chr11 | 533377    | 533496    |
| AMPL7171869013 | chr11 | 533478    | 533616    |
| AMPL7171902118 | chr11 | 533799    | 533929    |
| AMPL7170083455 | chr11 | 534221    | 534307    |
| AMPL7154679234 | chr11 | 534264    | 534348    |
| AMPL7171901935 | chr11 | 22646295  | 22646419  |
| AMPL7171891841 | chr11 | 22646439  | 22646562  |
| AMPL7170318298 | chr11 | 69455970  | 69456111  |
| AMPL7157266108 | chr11 | 69456096  | 69456231  |
| AMPL7157450846 | chr11 | 69456221  | 69456334  |
| AMPL7170319339 | chr11 | 69457728  | 69457849  |
| AMPL7171195852 | chr11 | 69457870  | 69458008  |
| AMPL7170319267 | chr11 | 69457978  | 69458115  |
| AMPL7170199804 | chr11 | 69458605  | 69458706  |
| AMPL7171902015 | chr11 | 69458690  | 69458806  |
| AMPL7171404332 | chr11 | 69462778  | 69462887  |
| AMPL7170202224 | chr11 | 69462876  | 69462959  |
| AMPL7171049851 | chr11 | 69465777  | 69465911  |
| AMPL7170318722 | chr11 | 69465916  | 69466044  |
| AMPL7171902040 | chr11 | 94153277  | 94153401  |
| AMPL7170326592 | chr11 | 94178977  | 94179089  |
| AMPL7170820990 | chr11 | 94180358  | 94180483  |
| AMPL7170326022 | chr11 | 94189446  | 94189564  |
| AMPL7171902127 | chr11 | 94194090  | 94194182  |
| AMPL7170111099 | chr11 | 108098340 | 108098408 |
| AMPL7170326319 | chr11 | 108098396 | 108098525 |
| AMPL7158273904 | chr11 | 108098494 | 108098598 |
| AMPL7152996649 | chr11 | 108098577 | 108098691 |
| AMPL7170326210 | chr11 | 108099893 | 108099998 |
| AMPL7170326014 | chr11 | 108099958 | 108100080 |
| AMPL7170326593 | chr11 | 108106355 | 108106473 |
| AMPL7169098460 | chr11 | 108106470 | 108106573 |
| AMPL7170308304 | chr11 | 108114602 | 108114719 |

|                |       |           |           |
|----------------|-------|-----------|-----------|
| AMPL7170326261 | chr11 | 108114706 | 108114829 |
| AMPL7170804362 | chr11 | 108114785 | 108114894 |
| AMPL7170326562 | chr11 | 108115505 | 108115625 |
| AMPL7170326477 | chr11 | 108115613 | 108115734 |
| AMPL7170325978 | chr11 | 108115728 | 108115846 |
| AMPL7170308166 | chr11 | 108117645 | 108117766 |
| AMPL7170325641 | chr11 | 108117714 | 108117836 |
| AMPL7170325893 | chr11 | 108117813 | 108117933 |
| AMPL7170326697 | chr11 | 108119587 | 108119714 |
| AMPL7170326268 | chr11 | 108119694 | 108119818 |
| AMPL7170326604 | chr11 | 108119765 | 108119885 |
| AMPL7170325994 | chr11 | 108121397 | 108121496 |
| AMPL7170326698 | chr11 | 108121483 | 108121603 |
| AMPL7170804708 | chr11 | 108121580 | 108121709 |
| AMPL7170804527 | chr11 | 108121687 | 108121807 |
| AMPL7170326116 | chr11 | 108122510 | 108122625 |
| AMPL7170326437 | chr11 | 108122618 | 108122739 |
| AMPL7170082762 | chr11 | 108122721 | 108122794 |
| AMPL7170326362 | chr11 | 108123519 | 108123625 |
| AMPL7170326461 | chr11 | 108123577 | 108123699 |
| AMPL7162533182 | chr11 | 108124514 | 108124635 |
| AMPL7170308165 | chr11 | 108124624 | 108124721 |
| AMPL7170326504 | chr11 | 108124707 | 108124829 |
| AMPL7170308283 | chr11 | 108126821 | 108126950 |
| AMPL7170326077 | chr11 | 108126956 | 108127056 |
| AMPL7170308303 | chr11 | 108127036 | 108127155 |
| AMPL7170308198 | chr11 | 108128202 | 108128319 |
| AMPL7170326180 | chr11 | 108128281 | 108128403 |
| AMPL7170308203 | chr11 | 108129700 | 108129805 |
| AMPL7170308156 | chr11 | 108129799 | 108129915 |
| AMPL7157481509 | chr11 | 108137891 | 108138012 |
| AMPL7170325765 | chr11 | 108137989 | 108138115 |
| AMPL7170326429 | chr11 | 108139082 | 108139192 |
| AMPL7170804891 | chr11 | 108139176 | 108139301 |
| AMPL7170804667 | chr11 | 108139236 | 108139359 |
| AMPL7170804470 | chr11 | 108141745 | 108141848 |
| AMPL7170113475 | chr11 | 108141828 | 108141920 |
| AMPL7170326030 | chr11 | 108141950 | 108142070 |
| AMPL7170804932 | chr11 | 108142056 | 108142176 |
| AMPL7170326583 | chr11 | 108143211 | 108143324 |
| AMPL7170804382 | chr11 | 108143311 | 108143421 |
| AMPL7170113300 | chr11 | 108143443 | 108143530 |
| AMPL7170326541 | chr11 | 108143494 | 108143616 |
| AMPL7170326061 | chr11 | 108150163 | 108150280 |
| AMPL7170326700 | chr11 | 108150255 | 108150369 |
| AMPL7170326721 | chr11 | 108151673 | 108151795 |
| AMPL7170326465 | chr11 | 108151795 | 108151912 |
| AMPL7170199451 | chr11 | 108153431 | 108153510 |
| AMPL7170325997 | chr11 | 108153496 | 108153605 |
| AMPL7170308257 | chr11 | 108153567 | 108153676 |

|                |       |           |           |
|----------------|-------|-----------|-----------|
| AMPL7170308307 | chr11 | 108154887 | 108155005 |
| AMPL7170804598 | chr11 | 108154988 | 108155111 |
| AMPL7170326498 | chr11 | 108155093 | 108155205 |
| AMPL7170325993 | chr11 | 108158275 | 108158397 |
| AMPL7170326086 | chr11 | 108158373 | 108158494 |
| AMPL7170804726 | chr11 | 108159655 | 108159733 |
| AMPL7170326226 | chr11 | 108159719 | 108159838 |
| AMPL7170334621 | chr11 | 108160304 | 108160417 |
| AMPL7170804778 | chr11 | 108160385 | 108160485 |
| AMPL7170326043 | chr11 | 108160473 | 108160558 |
| AMPL7163020447 | chr11 | 108163275 | 108163397 |
| AMPL7170804387 | chr11 | 108163379 | 108163500 |
| AMPL7170804810 | chr11 | 108163448 | 108163565 |
| AMPL7170804842 | chr11 | 108163989 | 108164107 |
| AMPL7170326195 | chr11 | 108164075 | 108164178 |
| AMPL7170804375 | chr11 | 108164152 | 108164254 |
| AMPL7170326488 | chr11 | 108165630 | 108165752 |
| AMPL7170326688 | chr11 | 108165736 | 108165857 |
| AMPL7170308270 | chr11 | 108167997 | 108168122 |
| AMPL7170325798 | chr11 | 108170343 | 108170465 |
| AMPL7170308346 | chr11 | 108170454 | 108170578 |
| AMPL7170326208 | chr11 | 108170536 | 108170655 |
| AMPL7170097240 | chr11 | 108172361 | 108172456 |
| AMPL7170325657 | chr11 | 108172444 | 108172569 |
| AMPL7170326421 | chr11 | 108173541 | 108173642 |
| AMPL7170097062 | chr11 | 108173612 | 108173707 |
| AMPL7170325902 | chr11 | 108173693 | 108173815 |
| AMPL7154394781 | chr11 | 108175383 | 108175464 |
| AMPL7170098208 | chr11 | 108175434 | 108175525 |
| AMPL7170326600 | chr11 | 108175510 | 108175624 |
| AMPL7170326564 | chr11 | 108178582 | 108178703 |
| AMPL7170326137 | chr11 | 108178634 | 108178749 |
| AMPL7170326296 | chr11 | 108180781 | 108180899 |
| AMPL7170326046 | chr11 | 108180899 | 108180972 |
| AMPL7170326385 | chr11 | 108180960 | 108181077 |
| AMPL7170308284 | chr11 | 108183107 | 108183210 |
| AMPL7170326423 | chr11 | 108183159 | 108183280 |
| AMPL7170326635 | chr11 | 108186469 | 108186587 |
| AMPL7170326454 | chr11 | 108186555 | 108186671 |
| AMPL7170326260 | chr11 | 108186727 | 108186849 |
| AMPL7170804474 | chr11 | 108188070 | 108188184 |
| AMPL7170326381 | chr11 | 108188157 | 108188275 |
| AMPL7170326598 | chr11 | 108190626 | 108190721 |
| AMPL7170326056 | chr11 | 108190704 | 108190825 |
| AMPL7155669633 | chr11 | 108191948 | 108192075 |
| AMPL7170804397 | chr11 | 108192057 | 108192179 |
| AMPL7170326018 | chr11 | 108196028 | 108196151 |
| AMPL7170326403 | chr11 | 108196117 | 108196239 |
| AMPL7170326236 | chr11 | 108196228 | 108196337 |
| AMPL7170804718 | chr11 | 108196712 | 108196843 |

|                |       |           |           |
|----------------|-------|-----------|-----------|
| AMPL7170326016 | chr11 | 108196842 | 108196961 |
| AMPL7170326382 | chr11 | 108198338 | 108198459 |
| AMPL7170326005 | chr11 | 108198380 | 108198498 |
| AMPL7158863678 | chr11 | 108199641 | 108199755 |
| AMPL7170804712 | chr11 | 108199749 | 108199860 |
| AMPL7170804517 | chr11 | 108199850 | 108199971 |
| AMPL7170326653 | chr11 | 108200928 | 108201044 |
| AMPL7170326231 | chr11 | 108201031 | 108201153 |
| AMPL7170804582 | chr11 | 108202089 | 108202214 |
| AMPL7170308317 | chr11 | 108202189 | 108202286 |
| AMPL7170326596 | chr11 | 108202280 | 108202399 |
| AMPL7170804904 | chr11 | 108202543 | 108202660 |
| AMPL7170804820 | chr11 | 108202648 | 108202769 |
| AMPL7170326404 | chr11 | 108203458 | 108203557 |
| AMPL7170326517 | chr11 | 108203545 | 108203659 |
| AMPL7170325757 | chr11 | 108204550 | 108204669 |
| AMPL7170325655 | chr11 | 108204652 | 108204772 |
| AMPL7170308163 | chr11 | 108205593 | 108205710 |
| AMPL7170326446 | chr11 | 108205707 | 108205793 |
| AMPL7170326691 | chr11 | 108205764 | 108205853 |
| AMPL7170326069 | chr11 | 108206521 | 108206644 |
| AMPL7170326079 | chr11 | 108206628 | 108206721 |
| AMPL7170326073 | chr11 | 108213917 | 108214036 |
| AMPL7170326297 | chr11 | 108214017 | 108214139 |
| AMPL7170308237 | chr11 | 108216397 | 108216514 |
| AMPL7170326444 | chr11 | 108216514 | 108216611 |
| AMPL7170804559 | chr11 | 108216580 | 108216703 |
| AMPL7170325863 | chr11 | 108217931 | 108218050 |
| AMPL7170326368 | chr11 | 108218023 | 108218144 |
| AMPL7170308331 | chr11 | 108224467 | 108224588 |
| AMPL7170308246 | chr11 | 108224526 | 108224638 |
| AMPL7170325793 | chr11 | 108225459 | 108225576 |
| AMPL7170325768 | chr11 | 108225565 | 108225689 |
| AMPL7170326179 | chr11 | 108235728 | 108235851 |
| AMPL7170326040 | chr11 | 108235834 | 108235951 |
| AMPL7170326218 | chr11 | 108235984 | 108236104 |
| AMPL7170326578 | chr11 | 108236069 | 108236188 |
| AMPL7170326485 | chr11 | 108236164 | 108236285 |
| AMPL7170373534 | chr11 | 125505333 | 125505453 |
| AMPL7171894629 | chr11 | 125513987 | 125514104 |
| AMPL7170811027 | chr11 | 125514050 | 125514153 |
| AMPL7170374167 | chr11 | 125525038 | 125525161 |
| AMPL7171902103 | chr11 | 125525185 | 125525306 |
| AMPL7170318392 | chr12 | 25368418  | 25368538  |
| AMPL7170081672 | chr12 | 25378540  | 25378612  |
| AMPL7170081886 | chr12 | 25380189  | 25380281  |
| AMPL7170121181 | chr12 | 25380260  | 25380364  |
| AMPL7170308261 | chr12 | 25398187  | 25398310  |
| AMPL7170319135 | chr12 | 25398271  | 25398388  |
| AMPL7170545736 | chr12 | 133208921 | 133209047 |

|                |       |           |           |
|----------------|-------|-----------|-----------|
| AMPL7171869541 | chr12 | 133219911 | 133220040 |
| AMPL7170373515 | chr12 | 133241860 | 133241949 |
| AMPL7170373302 | chr12 | 133244926 | 133245050 |
| AMPL7171869374 | chr12 | 133249229 | 133249353 |
| AMPL7170083264 | chr12 | 133249750 | 133249829 |
| AMPL7170623115 | chr12 | 133249790 | 133249915 |
| AMPL7170623389 | chr12 | 133250049 | 133250187 |
| AMPL7170624240 | chr12 | 133250157 | 133250291 |
| AMPL7170319362 | chr12 | 133250274 | 133250377 |
| AMPL7170319365 | chr12 | 133251908 | 133252033 |
| AMPL7170333331 | chr12 | 133252000 | 133252137 |
| AMPL7170545139 | chr12 | 133252116 | 133252225 |
| AMPL7171869316 | chr12 | 133252239 | 133252374 |
| AMPL7170623286 | chr12 | 133252327 | 133252452 |
| AMPL7170319363 | chr12 | 133252601 | 133252725 |
| AMPL7170319358 | chr12 | 133252678 | 133252800 |
| AMPL7170332667 | chr12 | 133252779 | 133252904 |
| AMPL7170623724 | chr12 | 133252941 | 133253068 |
| AMPL7170319368 | chr12 | 133253038 | 133253160 |
| AMPL7170088191 | chr12 | 133253156 | 133253253 |
| AMPL7170329140 | chr12 | 133253221 | 133253337 |
| AMPL7170318813 | chr13 | 32890530  | 32890652  |
| AMPL7154368026 | chr13 | 32890603  | 32890727  |
| AMPL7170318615 | chr13 | 32893198  | 32893316  |
| AMPL7170318104 | chr13 | 32893273  | 32893381  |
| AMPL7170318688 | chr13 | 32893366  | 32893483  |
| AMPL7170318189 | chr13 | 32899201  | 32899308  |
| AMPL7170318911 | chr13 | 32899290  | 32899414  |
| AMPL7170319263 | chr13 | 32900249  | 32900373  |
| AMPL7170319118 | chr13 | 32900301  | 32900412  |
| AMPL7170318040 | chr13 | 32900410  | 32900529  |
| AMPL7170334658 | chr13 | 32900559  | 32900678  |
| AMPL7170330042 | chr13 | 32900659  | 32900780  |
| AMPL7170318334 | chr13 | 32903522  | 32903637  |
| AMPL7170331981 | chr13 | 32903614  | 32903733  |
| AMPL7170318121 | chr13 | 32905020  | 32905140  |
| AMPL7170329305 | chr13 | 32905122  | 32905244  |
| AMPL7170318458 | chr13 | 32906336  | 32906453  |
| AMPL7170318258 | chr13 | 32906426  | 32906515  |
| AMPL7170319013 | chr13 | 32906512  | 32906610  |
| AMPL7170319181 | chr13 | 32906601  | 32906684  |
| AMPL7170318243 | chr13 | 32906654  | 32906771  |
| AMPL7170319117 | chr13 | 32906762  | 32906868  |
| AMPL7170318758 | chr13 | 32906858  | 32906981  |
| AMPL7157781722 | chr13 | 32906960  | 32907067  |
| AMPL7170319164 | chr13 | 32907051  | 32907172  |
| AMPL7170319309 | chr13 | 32907168  | 32907284  |
| AMPL7170318200 | chr13 | 32907230  | 32907336  |
| AMPL7170318135 | chr13 | 32907335  | 32907461  |
| AMPL7170319351 | chr13 | 32907453  | 32907561  |

|                |       |          |          |
|----------------|-------|----------|----------|
| AMPL7170318226 | chr13 | 32910386 | 32910454 |
| AMPL7170318378 | chr13 | 32910423 | 32910512 |
| AMPL7170318402 | chr13 | 32910497 | 32910605 |
| AMPL7170318242 | chr13 | 32910570 | 32910671 |
| AMPL7170319146 | chr13 | 32910648 | 32910772 |
| AMPL7170319001 | chr13 | 32910763 | 32910852 |
| AMPL7170318347 | chr13 | 32910819 | 32910934 |
| AMPL7170318446 | chr13 | 32910900 | 32911017 |
| AMPL7170319338 | chr13 | 32910997 | 32911118 |
| AMPL7170318626 | chr13 | 32911077 | 32911189 |
| AMPL7170319208 | chr13 | 32911186 | 32911296 |
| AMPL7170318841 | chr13 | 32911251 | 32911370 |
| AMPL7170318912 | chr13 | 32911352 | 32911472 |
| AMPL7170318814 | chr13 | 32911421 | 32911519 |
| AMPL7170318262 | chr13 | 32911519 | 32911620 |
| AMPL7170318050 | chr13 | 32911571 | 32911675 |
| AMPL7170318868 | chr13 | 32911670 | 32911783 |
| AMPL7170318229 | chr13 | 32911781 | 32911888 |
| AMPL7170318274 | chr13 | 32911831 | 32911946 |
| AMPL7170318917 | chr13 | 32911934 | 32912017 |
| AMPL7170311679 | chr13 | 32911989 | 32912065 |
| AMPL7170318113 | chr13 | 32912065 | 32912173 |
| AMPL7170318517 | chr13 | 32912109 | 32912234 |
| AMPL7170318284 | chr13 | 32912218 | 32912287 |
| AMPL7170318848 | chr13 | 32912278 | 32912373 |
| AMPL7170085939 | chr13 | 32912403 | 32912467 |
| AMPL7170318068 | chr13 | 32912424 | 32912533 |
| AMPL7170085454 | chr13 | 32912517 | 32912593 |
| AMPL7170319201 | chr13 | 32912581 | 32912659 |
| AMPL7170085046 | chr13 | 32912638 | 32912712 |
| AMPL7170318501 | chr13 | 32912698 | 32912802 |
| AMPL7170318600 | chr13 | 32912802 | 32912916 |
| AMPL7164384001 | chr13 | 32912864 | 32912986 |
| AMPL7170318946 | chr13 | 32912980 | 32913058 |
| AMPL7170318655 | chr13 | 32913034 | 32913158 |
| AMPL7170085048 | chr13 | 32913125 | 32913201 |
| AMPL7170318445 | chr13 | 32913197 | 32913309 |
| AMPL7170085086 | chr13 | 32913247 | 32913333 |
| AMPL7170318588 | chr13 | 32913345 | 32913430 |
| AMPL7170318027 | chr13 | 32913392 | 32913490 |
| AMPL7170318586 | chr13 | 32913469 | 32913567 |
| AMPL7170319329 | chr13 | 32913545 | 32913650 |
| AMPL7170318157 | chr13 | 32913618 | 32913716 |
| AMPL7170318545 | chr13 | 32913703 | 32913790 |
| AMPL7170318472 | chr13 | 32913759 | 32913865 |
| AMPL7170085749 | chr13 | 32913836 | 32913923 |
| AMPL7170319168 | chr13 | 32913912 | 32913992 |
| AMPL7167079445 | chr13 | 32913966 | 32914036 |
| AMPL7170319175 | chr13 | 32914036 | 32914163 |
| AMPL7170319033 | chr13 | 32914153 | 32914237 |

|                |       |          |          |
|----------------|-------|----------|----------|
| AMPL7170319315 | chr13 | 32914204 | 32914291 |
| AMPL7170319060 | chr13 | 32914287 | 32914399 |
| AMPL7170319023 | chr13 | 32914355 | 32914476 |
| AMPL7170319297 | chr13 | 32914444 | 32914546 |
| AMPL7170319010 | chr13 | 32914528 | 32914645 |
| AMPL7155551814 | chr13 | 32914587 | 32914710 |
| AMPL7170318695 | chr13 | 32914690 | 32914814 |
| AMPL7170318770 | chr13 | 32914791 | 32914895 |
| AMPL7170319230 | chr13 | 32914860 | 32914982 |
| AMPL7170318975 | chr13 | 32914976 | 32915047 |
| AMPL7170319180 | chr13 | 32915043 | 32915161 |
| AMPL7170318802 | chr13 | 32915108 | 32915228 |
| AMPL7170425658 | chr13 | 32915224 | 32915346 |
| AMPL7170318510 | chr13 | 32918652 | 32918769 |
| AMPL7170318882 | chr13 | 32918719 | 32918813 |
| AMPL7170318522 | chr13 | 32920879 | 32920996 |
| AMPL7170086693 | chr13 | 32920981 | 32921054 |
| AMPL7170319300 | chr13 | 32929017 | 32929108 |
| AMPL7170318723 | chr13 | 32929068 | 32929178 |
| AMPL7170318854 | chr13 | 32929157 | 32929274 |
| AMPL7170318967 | chr13 | 32929260 | 32929379 |
| AMPL7170318152 | chr13 | 32929319 | 32929441 |
| AMPL7170319212 | chr13 | 32930589 | 32930687 |
| AMPL7170085706 | chr13 | 32930673 | 32930765 |
| AMPL7170318938 | chr13 | 32931804 | 32931921 |
| AMPL7170318691 | chr13 | 32931908 | 32932032 |
| AMPL7170319073 | chr13 | 32931991 | 32932110 |
| AMPL7170318565 | chr13 | 32936626 | 32936748 |
| AMPL7170318701 | chr13 | 32936748 | 32936866 |
| AMPL7170318352 | chr13 | 32937283 | 32937404 |
| AMPL7170318834 | chr13 | 32937384 | 32937503 |
| AMPL7170318653 | chr13 | 32937479 | 32937591 |
| AMPL7170318781 | chr13 | 32937559 | 32937680 |
| AMPL7170318618 | chr13 | 32944471 | 32944584 |
| AMPL7170318622 | chr13 | 32944558 | 32944642 |
| AMPL7170318772 | chr13 | 32944624 | 32944743 |
| AMPL7170318464 | chr13 | 32945051 | 32945162 |
| AMPL7170318476 | chr13 | 32945147 | 32945252 |
| AMPL7170318206 | chr13 | 32950730 | 32950853 |
| AMPL7170318580 | chr13 | 32950837 | 32950951 |
| AMPL7170318651 | chr13 | 32953387 | 32953505 |
| AMPL7170318408 | chr13 | 32953465 | 32953583 |
| AMPL7170318049 | chr13 | 32953551 | 32953646 |
| AMPL7170318828 | chr13 | 32953634 | 32953755 |
| AMPL7170331482 | chr13 | 32953784 | 32953899 |
| AMPL7157782884 | chr13 | 32953880 | 32954002 |
| AMPL7170319334 | chr13 | 32953972 | 32954084 |
| AMPL7170318523 | chr13 | 32954111 | 32954230 |
| AMPL7170319302 | chr13 | 32954218 | 32954332 |
| AMPL7170318101 | chr13 | 32968781 | 32968880 |



|                |       |           |           |
|----------------|-------|-----------|-----------|
| AMPL7170318713 | chr13 | 32968875  | 32968996  |
| AMPL7170319078 | chr13 | 32968979  | 32969085  |
| AMPL7170319050 | chr13 | 32971018  | 32971141  |
| AMPL7170319346 | chr13 | 32971102  | 32971223  |
| AMPL7170319104 | chr13 | 32972286  | 32972401  |
| AMPL7170318890 | chr13 | 32972366  | 32972489  |
| AMPL7170318703 | chr13 | 32972476  | 32972598  |
| AMPL7170318465 | chr13 | 32972586  | 32972707  |
| AMPL7170318955 | chr13 | 32972690  | 32972813  |
| AMPL7170318187 | chr13 | 32972807  | 32972922  |
| AMPL7170422410 | chr13 | 48878051  | 48878180  |
| AMPL7170080842 | chr13 | 48878144  | 48878238  |
| AMPL7170421748 | chr13 | 48881428  | 48881528  |
| AMPL7171901972 | chr13 | 48916693  | 48916799  |
| AMPL7171902097 | chr13 | 48916817  | 48916901  |
| AMPL7171891864 | chr13 | 48919276  | 48919377  |
| AMPL7170081077 | chr13 | 48921923  | 48921998  |
| AMPL7170622197 | chr13 | 48921968  | 48922084  |
| AMPL7171902017 | chr13 | 48923035  | 48923131  |
| AMPL7169638873 | chr13 | 48923120  | 48923212  |
| AMPL7171902065 | chr13 | 48934058  | 48934175  |
| AMPL7170559101 | chr13 | 48934126  | 48934240  |
| AMPL7170420909 | chr13 | 48936957  | 48937062  |
| AMPL7170624792 | chr13 | 48937021  | 48937128  |
| AMPL7171891922 | chr13 | 48938970  | 48939096  |
| AMPL7171901924 | chr13 | 48939031  | 48939150  |
| AMPL7170875789 | chr13 | 48941590  | 48941710  |
| AMPL7170647023 | chr13 | 48941654  | 48941760  |
| AMPL7170558825 | chr13 | 48947553  | 48947661  |
| AMPL7171902088 | chr13 | 48951030  | 48951152  |
| AMPL7171902130 | chr13 | 48951143  | 48951223  |
| AMPL7170104478 | chr13 | 48953705  | 48953770  |
| AMPL7171891908 | chr13 | 48954199  | 48954309  |
| AMPL7170420947 | chr13 | 48954319  | 48954410  |
| AMPL7170424325 | chr13 | 48955359  | 48955474  |
| AMPL7171902114 | chr13 | 48955451  | 48955569  |
| AMPL7170325862 | chr13 | 49027095  | 49027200  |
| AMPL7170202534 | chr13 | 49027192  | 49027279  |
| AMPL7170420618 | chr13 | 49030317  | 49030438  |
| AMPL7171574538 | chr13 | 49030411  | 49030530  |
| AMPL7170325678 | chr13 | 49033831  | 49033952  |
| AMPL7170325842 | chr13 | 49037844  | 49037961  |
| AMPL7162580182 | chr13 | 49037944  | 49038051  |
| AMPL7170104960 | chr13 | 49039143  | 49039240  |
| AMPL7170423410 | chr13 | 49039261  | 49039387  |
| AMPL7170422263 | chr13 | 49039366  | 49039491  |
| AMPL7170423569 | chr13 | 49047404  | 49047519  |
| AMPL7170421355 | chr13 | 49050795  | 49050912  |
| AMPL7169707799 | chr13 | 103506617 | 103506703 |
| AMPL7170595632 | chr13 | 103508386 | 103508494 |

|                |       |           |           |
|----------------|-------|-----------|-----------|
| AMPL7170596598 | chr13 | 103515030 | 103515145 |
| AMPL7171868824 | chr13 | 103519070 | 103519183 |
| AMPL7170812178 | chr13 | 103524521 | 103524619 |
| AMPL7170595722 | chr13 | 103524602 | 103524720 |
| AMPL7171869375 | chr13 | 103527591 | 103527714 |
| AMPL7170373844 | chr14 | 68301813  | 68301933  |
| AMPL7170287075 | chr14 | 68331738  | 68331837  |
| AMPL7171894627 | chr14 | 68331824  | 68331916  |
| AMPL7171901971 | chr14 | 68352599  | 68352692  |
| AMPL7170816298 | chr14 | 68353800  | 68353905  |
| AMPL7170821163 | chr14 | 68353885  | 68354007  |
| AMPL7170374381 | chr14 | 68758564  | 68758686  |
| AMPL7170808268 | chr14 | 68878092  | 68878217  |
| AMPL7170374393 | chr14 | 69061303  | 69061428  |
| AMPL7171901977 | chr14 | 105236655 | 105236755 |
| AMPL7170832245 | chr14 | 105237139 | 105237242 |
| AMPL7171902045 | chr14 | 105239114 | 105239227 |
| AMPL7171033520 | chr14 | 105239329 | 105239463 |
| AMPL7171902113 | chr14 | 105239567 | 105239702 |
| AMPL7171049737 | chr14 | 105239853 | 105239983 |
| AMPL7170319020 | chr14 | 105241323 | 105241450 |
| AMPL7170876413 | chr14 | 105242033 | 105242165 |
| AMPL7170319239 | chr14 | 105242948 | 105243085 |
| AMPL7170318313 | chr14 | 105243063 | 105243198 |
| AMPL7170176225 | chr14 | 105246406 | 105246506 |
| AMPL7170479882 | chr14 | 105246470 | 105246586 |
| AMPL7170326400 | chr15 | 41020920  | 41021042  |
| AMPL7162579763 | chr15 | 89816598  | 89816714  |
| AMPL7171033572 | chr15 | 89828339  | 89828457  |
| AMPL7171033083 | chr15 | 89834864  | 89834987  |
| AMPL7171652691 | chr15 | 89836119  | 89836239  |
| AMPL7171891933 | chr15 | 89837168  | 89837292  |
| AMPL7171651702 | chr15 | 89848380  | 89848492  |
| AMPL7171033503 | chr15 | 89857893  | 89858013  |
| AMPL7171033238 | chr15 | 89859605  | 89859729  |
| AMPL7163715862 | chr15 | 91303401  | 91303491  |
| AMPL7171869214 | chr15 | 91304067  | 91304179  |
| AMPL7170807867 | chr15 | 91304183  | 91304302  |
| AMPL7170365439 | chr15 | 91312645  | 91312768  |
| AMPL7170806324 | chr15 | 91333843  | 91333967  |
| AMPL7170365278 | chr15 | 91337432  | 91337551  |
| AMPL7170364908 | chr16 | 23614760  | 23614856  |
| AMPL7170332101 | chr16 | 23614844  | 23614959  |
| AMPL7170332699 | chr16 | 23614928  | 23615053  |
| AMPL7170425508 | chr16 | 23619164  | 23619275  |
| AMPL7170336370 | chr16 | 23619262  | 23619383  |
| AMPL7170336146 | chr16 | 23625257  | 23625378  |
| AMPL7170328941 | chr16 | 23625363  | 23625489  |
| AMPL7170333835 | chr16 | 23632631  | 23632750  |
| AMPL7170333670 | chr16 | 23632697  | 23632817  |

|                |       |          |          |
|----------------|-------|----------|----------|
| AMPL7170330720 | chr16 | 23634245 | 23634367 |
| AMPL7170334095 | chr16 | 23634339 | 23634463 |
| AMPL7170425176 | chr16 | 23635315 | 23635432 |
| AMPL7170333014 | chr16 | 23637525 | 23637653 |
| AMPL7170330469 | chr16 | 23637629 | 23637754 |
| AMPL7170333085 | chr16 | 23640506 | 23640627 |
| AMPL7170334146 | chr16 | 23640907 | 23641020 |
| AMPL7170331461 | chr16 | 23641015 | 23641135 |
| AMPL7170333461 | chr16 | 23641091 | 23641215 |
| AMPL7170334206 | chr16 | 23641201 | 23641330 |
| AMPL7170335433 | chr16 | 23641286 | 23641411 |
| AMPL7170336194 | chr16 | 23641398 | 23641521 |
| AMPL7170333454 | chr16 | 23641497 | 23641621 |
| AMPL7170335445 | chr16 | 23641598 | 23641713 |
| AMPL7170328920 | chr16 | 23641701 | 23641822 |
| AMPL7170332238 | chr16 | 23646137 | 23646261 |
| AMPL7170330715 | chr16 | 23646241 | 23646361 |
| AMPL7170334114 | chr16 | 23646349 | 23646469 |
| AMPL7170328583 | chr16 | 23646443 | 23646555 |
| AMPL7170328665 | chr16 | 23646514 | 23646625 |
| AMPL7170332435 | chr16 | 23646621 | 23646733 |
| AMPL7170334075 | chr16 | 23646704 | 23646785 |
| AMPL7170334365 | chr16 | 23646778 | 23646900 |
| AMPL7170328766 | chr16 | 23646856 | 23646954 |
| AMPL7170335267 | chr16 | 23646949 | 23647049 |
| AMPL7170334113 | chr16 | 23647023 | 23647136 |
| AMPL7170330211 | chr16 | 23647099 | 23647226 |
| AMPL7170328950 | chr16 | 23647205 | 23647329 |
| AMPL7170146976 | chr16 | 23647297 | 23647390 |
| AMPL7162679764 | chr16 | 23647380 | 23647504 |
| AMPL7170334060 | chr16 | 23647503 | 23647603 |
| AMPL7170145563 | chr16 | 23647555 | 23647635 |
| AMPL7170330639 | chr16 | 23647664 | 23647780 |
| AMPL7162997616 | chr16 | 23649150 | 23649270 |
| AMPL7170330832 | chr16 | 23649268 | 23649376 |
| AMPL7170146670 | chr16 | 23649380 | 23649468 |
| AMPL7170146089 | chr16 | 23652389 | 23652489 |
| AMPL7169939244 | chr16 | 89806403 | 89806505 |
| AMPL7170373571 | chr16 | 89807216 | 89807335 |
| AMPL7170374316 | chr16 | 89812906 | 89813037 |
| AMPL7170374064 | chr16 | 89813168 | 89813290 |
| AMPL7170374239 | chr16 | 89816083 | 89816212 |
| AMPL7171725711 | chr16 | 89818529 | 89818655 |
| AMPL7171891855 | chr16 | 89828353 | 89828455 |
| AMPL7170373905 | chr16 | 89831272 | 89831384 |
| AMPL7171891867 | chr16 | 89831319 | 89831442 |
| AMPL7170373605 | chr16 | 89833510 | 89833629 |
| AMPL7170287349 | chr16 | 89838137 | 89838234 |
| AMPL7170373602 | chr16 | 89849218 | 89849340 |
| AMPL7170373993 | chr16 | 89851302 | 89851435 |

|                |       |          |          |
|----------------|-------|----------|----------|
| AMPL7170374101 | chr16 | 89869652 | 89869776 |
| AMPL7170287320 | chr16 | 89874678 | 89874758 |
| AMPL7170374343 | chr16 | 89877073 | 89877189 |
| AMPL7171653202 | chr16 | 89877352 | 89877474 |
| AMPL7170309695 | chr17 | 7572852  | 7572977  |
| AMPL7170309709 | chr17 | 7572930  | 7573030  |
| AMPL7171365824 | chr17 | 7573875  | 7574003  |
| AMPL7170309708 | chr17 | 7573931  | 7574045  |
| AMPL7170309701 | chr17 | 7576494  | 7576592  |
| AMPL7170309705 | chr17 | 7576564  | 7576687  |
| AMPL7153774031 | chr17 | 7576828  | 7576949  |
| AMPL7171365826 | chr17 | 7577006  | 7577137  |
| AMPL7171365820 | chr17 | 7577080  | 7577197  |
| AMPL7170836823 | chr17 | 7577485  | 7577622  |
| AMPL7170309710 | chr17 | 7578142  | 7578261  |
| AMPL7170623892 | chr17 | 7578240  | 7578363  |
| AMPL7171365823 | chr17 | 7578309  | 7578411  |
| AMPL7171365825 | chr17 | 7578397  | 7578518  |
| AMPL7171365822 | chr17 | 7578445  | 7578575  |
| AMPL7171365821 | chr17 | 7579276  | 7579395  |
| AMPL7170309693 | chr17 | 7579372  | 7579506  |
| AMPL7170327659 | chr17 | 7579451  | 7579582  |
| AMPL7170327642 | chr17 | 7579576  | 7579701  |
| AMPL7170327922 | chr17 | 7579618  | 7579732  |
| AMPL7170309720 | chr17 | 7579785  | 7579922  |
| AMPL7170365629 | chr17 | 33428153 | 33428279 |
| AMPL7171894632 | chr17 | 33428233 | 33428366 |
| AMPL7171894626 | chr17 | 33430476 | 33430606 |
| AMPL7170365359 | chr17 | 33434031 | 33434158 |
| AMPL7171869401 | chr17 | 33434432 | 33434557 |
| AMPL7171901952 | chr17 | 33443832 | 33443957 |
| AMPL7170332225 | chr17 | 33446557 | 33446671 |
| AMPL7170425492 | chr17 | 37618285 | 37618422 |
| AMPL7170425309 | chr17 | 37618387 | 37618514 |
| AMPL7170425518 | chr17 | 37618484 | 37618616 |
| AMPL7170425426 | chr17 | 37618603 | 37618734 |
| AMPL7170425435 | chr17 | 37618697 | 37618787 |
| AMPL7170425081 | chr17 | 37618773 | 37618902 |
| AMPL7170425724 | chr17 | 37618858 | 37618969 |
| AMPL7170425265 | chr17 | 37618963 | 37619086 |
| AMPL7170425455 | chr17 | 37619078 | 37619203 |
| AMPL7170424891 | chr17 | 37619130 | 37619256 |
| AMPL7170424468 | chr17 | 37619243 | 37619368 |
| AMPL7170425216 | chr17 | 37619315 | 37619432 |
| AMPL7170424638 | chr17 | 37627117 | 37627222 |
| AMPL7170425118 | chr17 | 37627158 | 37627279 |
| AMPL7170425597 | chr17 | 37627263 | 37627388 |
| AMPL7170424734 | chr17 | 37627363 | 37627471 |
| AMPL7170424427 | chr17 | 37627437 | 37627558 |
| AMPL7170424378 | chr17 | 37627541 | 37627665 |

|                |       |          |          |
|----------------|-------|----------|----------|
| AMPL7170424590 | chr17 | 37627617 | 37627743 |
| AMPL7170424508 | chr17 | 37627714 | 37627840 |
| AMPL7170424657 | chr17 | 37627821 | 37627948 |
| AMPL7170425287 | chr17 | 37627928 | 37628045 |
| AMPL7170425444 | chr17 | 37646742 | 37646867 |
| AMPL7170425134 | chr17 | 37646856 | 37646976 |
| AMPL7170424717 | chr17 | 37646976 | 37647081 |
| AMPL7170424893 | chr17 | 37648981 | 37649101 |
| AMPL7158542910 | chr17 | 37649032 | 37649151 |
| AMPL7170425547 | chr17 | 37650729 | 37650849 |
| AMPL7170752249 | chr17 | 37650830 | 37650952 |
| AMPL7170424552 | chr17 | 37657456 | 37657580 |
| AMPL7166736788 | chr17 | 37657514 | 37657635 |
| AMPL7170425516 | chr17 | 37657624 | 37657731 |
| AMPL7170425689 | chr17 | 37665911 | 37666029 |
| AMPL7170424646 | chr17 | 37667758 | 37667878 |
| AMPL7170425170 | chr17 | 37667855 | 37667980 |
| AMPL7170425708 | chr17 | 37671976 | 37672094 |
| AMPL7170425254 | chr17 | 37673644 | 37673773 |
| AMPL7170425459 | chr17 | 37673749 | 37673876 |
| AMPL7170424921 | chr17 | 37676181 | 37676308 |
| AMPL7170424944 | chr17 | 37676233 | 37676359 |
| AMPL7170424448 | chr17 | 37680916 | 37681038 |
| AMPL7170424658 | chr17 | 37681033 | 37681160 |
| AMPL7170840454 | chr17 | 37682047 | 37682159 |
| AMPL7170838904 | chr17 | 37682138 | 37682268 |
| AMPL7170839929 | chr17 | 37682248 | 37682380 |
| AMPL7170838671 | chr17 | 37682353 | 37682482 |
| AMPL7170424758 | chr17 | 37682451 | 37682575 |
| AMPL7170839306 | chr17 | 37686851 | 37686976 |
| AMPL7170840408 | chr17 | 37686955 | 37687066 |
| AMPL7170840825 | chr17 | 37687050 | 37687183 |
| AMPL7170839902 | chr17 | 37687164 | 37687294 |
| AMPL7170645696 | chr17 | 37687278 | 37687413 |
| AMPL7170646084 | chr17 | 37687390 | 37687519 |
| AMPL7170839868 | chr17 | 37687504 | 37687611 |
| AMPL7170624475 | chr17 | 37868166 | 37868259 |
| AMPL7170623688 | chr17 | 37879547 | 37879674 |
| AMPL7170318489 | chr17 | 37879709 | 37879844 |
| AMPL7157484523 | chr17 | 37879812 | 37879907 |
| AMPL7170692061 | chr17 | 37879884 | 37879972 |
| AMPL7170319222 | chr17 | 37880117 | 37880237 |
| AMPL7170319328 | chr17 | 37880224 | 37880354 |
| AMPL7170559049 | chr17 | 37880961 | 37881092 |
| AMPL7170318295 | chr17 | 37881080 | 37881207 |
| AMPL7171902125 | chr17 | 37881290 | 37881420 |
| AMPL7170318033 | chr17 | 37881389 | 37881503 |
| AMPL7170318267 | chr17 | 37881521 | 37881647 |
| AMPL7170203617 | chr17 | 37881642 | 37881730 |
| AMPL7170304558 | chr17 | 37881915 | 37881993 |

|                |       |          |          |
|----------------|-------|----------|----------|
| AMPL7170318572 | chr17 | 37881965 | 37882093 |
| AMPL7170318201 | chr17 | 37882087 | 37882212 |
| AMPL7170318795 | chr17 | 37882738 | 37882852 |
| AMPL7170448811 | chr17 | 37882863 | 37882973 |
| AMPL7170318453 | chr17 | 41197683 | 41197817 |
| AMPL7170860656 | chr17 | 41197773 | 41197877 |
| AMPL7170087639 | chr17 | 41199642 | 41199741 |
| AMPL7170318349 | chr17 | 41201118 | 41201241 |
| AMPL7170318717 | chr17 | 41203047 | 41203164 |
| AMPL7170318872 | chr17 | 41209055 | 41209177 |
| AMPL7170860650 | chr17 | 41215289 | 41215409 |
| AMPL7170860728 | chr17 | 41215866 | 41215983 |
| AMPL7170318148 | chr17 | 41219609 | 41219730 |
| AMPL7170860576 | chr17 | 41222930 | 41223048 |
| AMPL7170860620 | chr17 | 41223027 | 41223158 |
| AMPL7170860555 | chr17 | 41223147 | 41223264 |
| AMPL7170319039 | chr17 | 41226340 | 41226464 |
| AMPL7170318418 | chr17 | 41226437 | 41226565 |
| AMPL7170860603 | chr17 | 41228489 | 41228583 |
| AMPL7170860554 | chr17 | 41228553 | 41228665 |
| AMPL7170318684 | chr17 | 41231313 | 41231431 |
| AMPL7170318289 | chr17 | 41234413 | 41234526 |
| AMPL7170319082 | chr17 | 41234495 | 41234607 |
| AMPL7170318815 | chr17 | 41242918 | 41243038 |
| AMPL7170318839 | chr17 | 41242971 | 41243090 |
| AMPL7170318440 | chr17 | 41243392 | 41243515 |
| AMPL7170318299 | chr17 | 41243504 | 41243627 |
| AMPL7170318726 | chr17 | 41243611 | 41243730 |
| AMPL7170318900 | chr17 | 41243727 | 41243846 |
| AMPL7170319220 | chr17 | 41243832 | 41243954 |
| AMPL7170318154 | chr17 | 41243941 | 41244065 |
| AMPL7170318301 | chr17 | 41244054 | 41244168 |
| AMPL7170319110 | chr17 | 41244139 | 41244263 |
| AMPL7170318507 | chr17 | 41244257 | 41244375 |
| AMPL7170318944 | chr17 | 41244367 | 41244486 |
| AMPL7170318168 | chr17 | 41244486 | 41244610 |
| AMPL7157781194 | chr17 | 41244609 | 41244735 |
| AMPL7158722897 | chr17 | 41244730 | 41244847 |
| AMPL7170318373 | chr17 | 41244832 | 41244950 |
| AMPL7170319144 | chr17 | 41244935 | 41245051 |
| AMPL7170318098 | chr17 | 41245044 | 41245170 |
| AMPL7170318420 | chr17 | 41245169 | 41245292 |
| AMPL7158524919 | chr17 | 41245286 | 41245409 |
| AMPL7170318776 | chr17 | 41245404 | 41245525 |
| AMPL7170319253 | chr17 | 41245504 | 41245624 |
| AMPL7170319244 | chr17 | 41245590 | 41245712 |
| AMPL7170328456 | chr17 | 41245683 | 41245802 |
| AMPL7170333152 | chr17 | 41245784 | 41245907 |
| AMPL7170330034 | chr17 | 41245895 | 41246016 |
| AMPL7170331826 | chr17 | 41245985 | 41246111 |

|                |       |          |          |
|----------------|-------|----------|----------|
| AMPL7170864073 | chr17 | 41246086 | 41246187 |
| AMPL7170623742 | chr17 | 41246160 | 41246284 |
| AMPL7170318395 | chr17 | 41246268 | 41246390 |
| AMPL7170319169 | chr17 | 41246368 | 41246490 |
| AMPL7170318268 | chr17 | 41246472 | 41246587 |
| AMPL7170319142 | chr17 | 41246565 | 41246694 |
| AMPL7170319011 | chr17 | 41246666 | 41246791 |
| AMPL7170318730 | chr17 | 41246778 | 41246895 |
| AMPL7170318138 | chr17 | 41247846 | 41247967 |
| AMPL7170319322 | chr17 | 41249249 | 41249367 |
| AMPL7170860619 | chr17 | 41251754 | 41251866 |
| AMPL7170860686 | chr17 | 41251822 | 41251944 |
| AMPL7170860594 | chr17 | 41256049 | 41256182 |
| AMPL7170318752 | chr17 | 41256161 | 41256283 |
| AMPL7170318060 | chr17 | 41256868 | 41256992 |
| AMPL7170082182 | chr17 | 41258441 | 41258526 |
| AMPL7170860721 | chr17 | 41258512 | 41258631 |
| AMPL7170860626 | chr17 | 41267686 | 41267785 |
| AMPL7170318590 | chr17 | 41267763 | 41267885 |
| AMPL7170318893 | chr17 | 41276006 | 41276121 |
| AMPL7172214180 | chr17 | 46805577 | 46805702 |
| AMPL7172214181 | chr17 | 46805696 | 46805809 |
| AMPL7171894647 | chr17 | 56770033 | 56770148 |
| AMPL7170334848 | chr17 | 56772452 | 56772561 |
| AMPL7170335064 | chr17 | 56774091 | 56774211 |
| AMPL7170146882 | chr17 | 56787231 | 56787320 |
| AMPL7170328666 | chr17 | 56798097 | 56798208 |
| AMPL7171869027 | chr17 | 59760747 | 59760852 |
| AMPL7170329095 | chr17 | 59760824 | 59760942 |
| AMPL7170333536 | chr17 | 59760921 | 59761023 |
| AMPL7171902090 | chr17 | 59761279 | 59761399 |
| AMPL7171901981 | chr17 | 59761402 | 59761522 |
| AMPL7171653482 | chr17 | 59763231 | 59763350 |
| AMPL7170145978 | chr17 | 59763463 | 59763541 |
| AMPL7171901982 | chr17 | 59793320 | 59793394 |
| AMPL7171891940 | chr17 | 59820330 | 59820451 |
| AMPL7170335745 | chr17 | 59853688 | 59853812 |
| AMPL7170331174 | chr17 | 59858170 | 59858278 |
| AMPL7170424989 | chr17 | 59858302 | 59858405 |
| AMPL7170328364 | chr17 | 59861643 | 59861762 |
| AMPL7171901953 | chr17 | 59876449 | 59876572 |
| AMPL7171902071 | chr17 | 59878633 | 59878727 |
| AMPL7171901992 | chr17 | 59878750 | 59878849 |
| AMPL7171901957 | chr17 | 59885903 | 59886024 |
| AMPL7169918808 | chr17 | 59886034 | 59886117 |
| AMPL7170365675 | chr17 | 59924453 | 59924558 |
| AMPL7170331890 | chr17 | 59926450 | 59926574 |
| AMPL7170328635 | chr17 | 59937099 | 59937223 |
| AMPL7171902098 | chr17 | 59938844 | 59938967 |
| AMPL7170595856 | chr19 | 45855430 | 45855536 |

|                |       |          |          |
|----------------|-------|----------|----------|
| AMPL7170595651 | chr19 | 45855710 | 45855838 |
| AMPL7170596160 | chr19 | 45855792 | 45855913 |
| AMPL7171366107 | chr19 | 45855880 | 45855987 |
| AMPL7169255233 | chr19 | 45856012 | 45856104 |
| AMPL7170819376 | chr19 | 45856350 | 45856438 |
| AMPL7170818707 | chr19 | 45860949 | 45861078 |
| AMPL7171891935 | chr19 | 45868395 | 45868519 |
| AMPL7159089280 | chr19 | 45873426 | 45873556 |
| AMPL7170595989 | chr19 | 45873749 | 45873840 |
| AMPL7171451107 | chr19 | 45916741 | 45916864 |
| AMPL7170808094 | chr19 | 45917228 | 45917312 |
| AMPL7171869324 | chr19 | 45918188 | 45918289 |
| AMPL7171868987 | chr19 | 45924355 | 45924450 |
| AMPL7171869029 | chr2  | 25457167 | 25457264 |
| AMPL7171673257 | chr2  | 25464446 | 25464529 |
| AMPL7171869317 | chr2  | 25469049 | 25469166 |
| AMPL7171869254 | chr2  | 25469169 | 25469299 |
| AMPL7171869505 | chr2  | 25470425 | 25470525 |
| AMPL7170621388 | chr2  | 25470962 | 25471093 |
| AMPL7171380690 | chr2  | 47630401 | 47630516 |
| AMPL7170088060 | chr2  | 47630506 | 47630599 |
| AMPL7171894616 | chr2  | 47635508 | 47635618 |
| AMPL7157780050 | chr2  | 47635559 | 47635660 |
| AMPL7170332414 | chr2  | 47637250 | 47637377 |
| AMPL7171901938 | chr2  | 47637334 | 47637445 |
| AMPL7171208453 | chr2  | 47637456 | 47637557 |
| AMPL7170328215 | chr2  | 47639523 | 47639627 |
| AMPL7171902109 | chr2  | 47639582 | 47639682 |
| AMPL7171869120 | chr2  | 47639683 | 47639801 |
| AMPL7171894648 | chr2  | 47641382 | 47641482 |
| AMPL7170331380 | chr2  | 47641426 | 47641533 |
| AMPL7170334766 | chr2  | 47643407 | 47643529 |
| AMPL7171902047 | chr2  | 47656797 | 47656911 |
| AMPL7171902073 | chr2  | 47656912 | 47657019 |
| AMPL7170335597 | chr2  | 47656997 | 47657120 |
| AMPL7171902022 | chr2  | 47672613 | 47672733 |
| AMPL7170480679 | chr2  | 47672738 | 47672842 |
| AMPL7170329555 | chr2  | 47690169 | 47690292 |
| AMPL7170181398 | chr2  | 47693823 | 47693930 |
| AMPL7170328809 | chr2  | 47698128 | 47698227 |
| AMPL7170333913 | chr2  | 47702080 | 47702197 |
| AMPL7171902069 | chr2  | 47702217 | 47702290 |
| AMPL7171894644 | chr2  | 47702266 | 47702370 |
| AMPL7160675561 | chr2  | 47703427 | 47703551 |
| AMPL7170332477 | chr2  | 47703529 | 47703649 |
| AMPL7171894670 | chr2  | 47703671 | 47703757 |
| AMPL7170365067 | chr2  | 47705490 | 47705616 |
| AMPL7170331415 | chr2  | 47707837 | 47707962 |
| AMPL7171901959 | chr2  | 47707890 | 47708005 |
| AMPL7171869002 | chr2  | 47709859 | 47709961 |



|                |       |           |           |
|----------------|-------|-----------|-----------|
| AMPL7170334500 | chr2  | 48018028  | 48018157  |
| AMPL7170334916 | chr2  | 48018194  | 48018320  |
| AMPL7170331422 | chr2  | 48023022  | 48023143  |
| AMPL7171902070 | chr2  | 48025743  | 48025820  |
| AMPL7171901933 | chr2  | 48025822  | 48025941  |
| AMPL7171902028 | chr2  | 48025930  | 48026049  |
| AMPL7171902009 | chr2  | 48026113  | 48026226  |
| AMPL7171894657 | chr2  | 48026249  | 48026327  |
| AMPL7171901931 | chr2  | 48026351  | 48026457  |
| AMPL7170331289 | chr2  | 48026436  | 48026559  |
| AMPL7171902037 | chr2  | 48026579  | 48026704  |
| AMPL7162606051 | chr2  | 48026835  | 48026956  |
| AMPL7171902007 | chr2  | 48026988  | 48027095  |
| AMPL7170088862 | chr2  | 48027073  | 48027172  |
| AMPL7170328274 | chr2  | 48027302  | 48027429  |
| AMPL7171869432 | chr2  | 48027715  | 48027838  |
| AMPL7171728442 | chr2  | 48027765  | 48027890  |
| AMPL7171894638 | chr2  | 48027892  | 48027978  |
| AMPL7157782595 | chr2  | 48028001  | 48028126  |
| AMPL7170329189 | chr2  | 48030523  | 48030650  |
| AMPL7171401927 | chr2  | 48030637  | 48030760  |
| AMPL7170818007 | chr2  | 48032035  | 48032147  |
| AMPL7170365811 | chr2  | 48033357  | 48033478  |
| AMPL7170328313 | chr2  | 48033445  | 48033551  |
| AMPL7170365779 | chr2  | 48033644  | 48033764  |
| AMPL7171902041 | chr2  | 48033739  | 48033840  |
| AMPL7171869052 | chr2  | 58386921  | 58387040  |
| AMPL7171055439 | chr2  | 58388626  | 58388723  |
| AMPL7171055452 | chr2  | 58390576  | 58390687  |
| AMPL7171055449 | chr2  | 58431294  | 58431414  |
| AMPL7171600198 | chr2  | 58459198  | 58459297  |
| AMPL7171868844 | chr2  | 190682720 | 190682843 |
| AMPL7170595999 | chr2  | 190717341 | 190717462 |
| AMPL7170596145 | chr2  | 190718612 | 190718734 |
| AMPL7171869526 | chr2  | 190718943 | 190719050 |
| AMPL7159089783 | chr2  | 190719477 | 190719596 |
| AMPL7171869558 | chr2  | 190728663 | 190728787 |
| AMPL7171902027 | chr2  | 215595052 | 215595166 |
| AMPL7171869402 | chr2  | 215595150 | 215595264 |
| AMPL7171902095 | chr2  | 215645463 | 215645573 |
| AMPL7171891944 | chr2  | 215645703 | 215645822 |
| AMPL7171902086 | chr2  | 215645864 | 215645988 |
| AMPL7171891877 | chr2  | 215646012 | 215646138 |
| AMPL7170335942 | chr2  | 215657026 | 215657145 |
| AMPL7170326323 | chr22 | 29083967  | 29084097  |
| AMPL7170326033 | chr22 | 29089946  | 29090052  |
| AMPL7170326001 | chr22 | 29090040  | 29090159  |
| AMPL7170326311 | chr22 | 29091081  | 29091211  |
| AMPL7170326127 | chr22 | 29091142  | 29091270  |
| AMPL7170326353 | chr22 | 29091676  | 29091805  |

|                |       |          |          |
|----------------|-------|----------|----------|
| AMPL7170326105 | chr22 | 29091789 | 29091923 |
| AMPL7170326369 | chr22 | 29092876 | 29092996 |
| AMPL7170326251 | chr22 | 29095746 | 29095866 |
| AMPL7170326000 | chr22 | 29095856 | 29095972 |
| AMPL7153201261 | chr22 | 29099461 | 29099584 |
| AMPL7170091413 | chr22 | 29105951 | 29106041 |
| AMPL7163020393 | chr22 | 29106034 | 29106146 |
| AMPL7170111315 | chr22 | 29107879 | 29107952 |
| AMPL7170326730 | chr22 | 29107894 | 29108011 |
| AMPL7170425609 | chr22 | 29107997 | 29108114 |
| AMPL7170111822 | chr22 | 29115332 | 29115421 |
| AMPL7170326438 | chr22 | 29115408 | 29115516 |
| AMPL7170326052 | chr22 | 29120922 | 29121043 |
| AMPL7170326168 | chr22 | 29121003 | 29121123 |
| AMPL7170326151 | chr22 | 29121207 | 29121329 |
| AMPL7170326245 | chr22 | 29121309 | 29121431 |
| AMPL7170118411 | chr22 | 29126411 | 29126515 |
| AMPL7170336028 | chr22 | 29130380 | 29130494 |
| AMPL7170325968 | chr22 | 29130481 | 29130594 |
| AMPL7170335153 | chr22 | 29130584 | 29130712 |
| AMPL7170336255 | chr22 | 29130694 | 29130784 |
| AMPL7171224802 | chr22 | 30057140 | 30057246 |
| AMPL7170305164 | chr22 | 30067801 | 30067926 |
| AMPL7170374203 | chr3  | 10083278 | 10083397 |
| AMPL7170374315 | chr3  | 10101920 | 10102033 |
| AMPL7170374270 | chr3  | 10105394 | 10105522 |
| AMPL7170373915 | chr3  | 10106024 | 10106150 |
| AMPL7171651934 | chr3  | 10108897 | 10109003 |
| AMPL7171891840 | chr3  | 10116212 | 10116336 |
| AMPL7170374060 | chr3  | 10128791 | 10128903 |
| AMPL7170334512 | chr3  | 37035048 | 37035179 |
| AMPL7171901985 | chr3  | 37038012 | 37038135 |
| AMPL7170546080 | chr3  | 37038153 | 37038273 |
| AMPL7170336175 | chr3  | 37042398 | 37042517 |
| AMPL7170087742 | chr3  | 37042481 | 37042573 |
| AMPL7170087112 | chr3  | 37045873 | 37045962 |
| AMPL7170335834 | chr3  | 37048440 | 37048559 |
| AMPL7170335741 | chr3  | 37055857 | 37055975 |
| AMPL7170094162 | chr3  | 37056001 | 37056093 |
| AMPL7170328392 | chr3  | 37061833 | 37061961 |
| AMPL7170325867 | chr3  | 37067228 | 37067338 |
| AMPL7158781874 | chr3  | 37067336 | 37067464 |
| AMPL7170329398 | chr3  | 37067389 | 37067513 |
| AMPL7171208508 | chr3  | 37070287 | 37070413 |
| AMPL7170329460 | chr3  | 37081650 | 37081771 |
| AMPL7170821030 | chr3  | 37088962 | 37089085 |
| AMPL7170336121 | chr3  | 37090034 | 37090161 |
| AMPL7170330529 | chr3  | 37090414 | 37090539 |
| AMPL7171894635 | chr3  | 37091981 | 37092102 |
| AMPL7170080659 | chr3  | 41266008 | 41266088 |

|                |      |           |           |
|----------------|------|-----------|-----------|
| AMPL7170365876 | chr3 | 41266074  | 41266193  |
| AMPL7170690627 | chr3 | 41266215  | 41266334  |
| AMPL7171902119 | chr3 | 41266779  | 41266901  |
| AMPL7170623698 | chr3 | 41267179  | 41267299  |
| AMPL7170352088 | chr3 | 41268741  | 41268864  |
| AMPL7170842474 | chr3 | 41274850  | 41274974  |
| AMPL7170157885 | chr3 | 41275074  | 41275164  |
| AMPL7170624092 | chr3 | 41275721  | 41275846  |
| AMPL7170352131 | chr3 | 41277748  | 41277852  |
| AMPL7170559141 | chr3 | 41277840  | 41277948  |
| AMPL7171404447 | chr3 | 52437225  | 52437352  |
| AMPL7170834031 | chr3 | 52437830  | 52437956  |
| AMPL7170181311 | chr3 | 52438419  | 52438527  |
| AMPL7170804220 | chr3 | 52440199  | 52440325  |
| AMPL7170372994 | chr3 | 52441160  | 52441291  |
| AMPL7171891937 | chr3 | 52442007  | 52442102  |
| AMPL7170804205 | chr3 | 52442548  | 52442674  |
| AMPL7170326525 | chr3 | 142177739 | 142177861 |
| AMPL7171902085 | chr3 | 142177973 | 142178093 |
| AMPL7170814928 | chr3 | 142178119 | 142178236 |
| AMPL7171032843 | chr3 | 142180822 | 142180911 |
| AMPL7171869174 | chr3 | 142183953 | 142184068 |
| AMPL7171891924 | chr3 | 142185232 | 142185353 |
| AMPL7171868947 | chr3 | 142188259 | 142188379 |
| AMPL7170326482 | chr3 | 142215811 | 142215933 |
| AMPL7171868863 | chr3 | 142217511 | 142217632 |
| AMPL7170326095 | chr3 | 142238546 | 142238659 |
| AMPL7170103762 | chr3 | 142261500 | 142261573 |
| AMPL7171901947 | chr3 | 142269009 | 142269126 |
| AMPL7171902055 | chr3 | 142272644 | 142272729 |
| AMPL7170326492 | chr3 | 142274685 | 142274806 |
| AMPL7170326041 | chr3 | 142274794 | 142274915 |
| AMPL7170104287 | chr3 | 142274877 | 142274962 |
| AMPL7171891854 | chr3 | 142277513 | 142277604 |
| AMPL7171622709 | chr3 | 142281407 | 142281529 |
| AMPL7171901920 | chr3 | 142284920 | 142285039 |
| AMPL7170318525 | chr3 | 178916679 | 178916785 |
| AMPL7171901951 | chr3 | 178916742 | 178916866 |
| AMPL7170318976 | chr3 | 178916844 | 178916946 |
| AMPL7170325752 | chr3 | 178916935 | 178917035 |
| AMPL7170318845 | chr3 | 178917416 | 178917537 |
| AMPL7170318269 | chr3 | 178921449 | 178921571 |
| AMPL7160402682 | chr3 | 178927933 | 178928022 |
| AMPL7170325785 | chr3 | 178928046 | 178928160 |
| AMPL7170365889 | chr3 | 178936052 | 178936179 |
| AMPL7170318556 | chr3 | 178938829 | 178938960 |
| AMPL7170081595 | chr3 | 178947808 | 178947900 |
| AMPL7170325662 | chr3 | 178951990 | 178952114 |
| AMPL7171901984 | chr3 | 178952073 | 178952192 |
| AMPL7170361219 | chr4 | 1795640   | 1795780   |

|                |      |           |           |
|----------------|------|-----------|-----------|
| AMPL7171196229 | chr4 | 1795757   | 1795885   |
| AMPL7170559504 | chr4 | 1801357   | 1801492   |
| AMPL7170361428 | chr4 | 1801464   | 1801602   |
| AMPL7170325769 | chr4 | 1803463   | 1803603   |
| AMPL7170359670 | chr4 | 1805523   | 1805647   |
| AMPL7170325644 | chr4 | 1805961   | 1806096   |
| AMPL7170325652 | chr4 | 1806084   | 1806217   |
| AMPL7171902000 | chr4 | 1806450   | 1806570   |
| AMPL7170158106 | chr4 | 1807288   | 1807397   |
| AMPL7170359823 | chr4 | 1807700   | 1807838   |
| AMPL7170157988 | chr4 | 1807788   | 1807894   |
| AMPL7171901927 | chr4 | 1807882   | 1808016   |
| AMPL7170102313 | chr4 | 1808001   | 1808095   |
| AMPL7171430650 | chr4 | 1808212   | 1808347   |
| AMPL7170623186 | chr5 | 67522673  | 67522800  |
| AMPL7171902039 | chr5 | 67575383  | 67575502  |
| AMPL7170577672 | chr5 | 67589449  | 67589548  |
| AMPL7171891942 | chr5 | 67589553  | 67589659  |
| AMPL7171891927 | chr5 | 67589660  | 67589773  |
| AMPL7171901942 | chr5 | 67590980  | 67591100  |
| AMPL7170577525 | chr5 | 67591084  | 67591207  |
| AMPL7170828919 | chr5 | 67591221  | 67591329  |
| AMPL7171902116 | chr5 | 67591288  | 67591411  |
| AMPL7170088270 | chr5 | 67592016  | 67592122  |
| AMPL7171033561 | chr5 | 67592101  | 67592229  |
| AMPL7170860761 | chr5 | 67593212  | 67593338  |
| AMPL7170373180 | chr5 | 112102870 | 112102991 |
| AMPL7171891920 | chr5 | 112102914 | 112103030 |
| AMPL7170372984 | chr5 | 112111345 | 112111441 |
| AMPL7170544588 | chr5 | 112128084 | 112128207 |
| AMPL7170548090 | chr5 | 112128184 | 112128264 |
| AMPL7170334386 | chr5 | 112151205 | 112151324 |
| AMPL7171869504 | chr5 | 112154903 | 112155023 |
| AMPL7171891857 | chr5 | 112157564 | 112157670 |
| AMPL7170545470 | chr5 | 112157683 | 112157806 |
| AMPL7170373328 | chr5 | 112162799 | 112162920 |
| AMPL7170544679 | chr5 | 112170557 | 112170678 |
| AMPL7171901940 | chr5 | 112170690 | 112170814 |
| AMPL7171901969 | chr5 | 112170819 | 112170905 |
| AMPL7171902014 | chr5 | 112173335 | 112173432 |
| AMPL7171901923 | chr5 | 112173599 | 112173719 |
| AMPL7171901980 | chr5 | 112173787 | 112173909 |
| AMPL7170372973 | chr5 | 112173879 | 112174006 |
| AMPL7170373507 | chr5 | 112174215 | 112174331 |
| AMPL7171777278 | chr5 | 112174361 | 112174479 |
| AMPL7171891892 | chr5 | 112174506 | 112174579 |
| AMPL7171323159 | chr5 | 112174597 | 112174721 |
| AMPL7164607197 | chr5 | 112174815 | 112174941 |
| AMPL7169188488 | chr5 | 112175056 | 112175154 |
| AMPL7171901999 | chr5 | 112175143 | 112175225 |

|                |      |           |           |
|----------------|------|-----------|-----------|
| AMPL7171901939 | chr5 | 112175214 | 112175332 |
| AMPL7157779721 | chr5 | 112175462 | 112175586 |
| AMPL7171901961 | chr5 | 112175544 | 112175661 |
| AMPL7170373235 | chr5 | 112175647 | 112175739 |
| AMPL7171902019 | chr5 | 112175711 | 112175818 |
| AMPL7171902050 | chr5 | 112175799 | 112175909 |
| AMPL7171902063 | chr5 | 112175898 | 112176016 |
| AMPL7170146404 | chr5 | 112176003 | 112176083 |
| AMPL7170373042 | chr5 | 112176060 | 112176183 |
| AMPL7170373409 | chr5 | 112176162 | 112176286 |
| AMPL7171902056 | chr5 | 112176352 | 112176476 |
| AMPL7170373503 | chr5 | 112176492 | 112176607 |
| AMPL7171902122 | chr5 | 112176588 | 112176705 |
| AMPL7171869496 | chr5 | 112176720 | 112176835 |
| AMPL7171902110 | chr5 | 112176868 | 112176990 |
| AMPL7171868765 | chr5 | 112177056 | 112177180 |
| AMPL7171868778 | chr5 | 112177117 | 112177243 |
| AMPL7171869438 | chr5 | 112177301 | 112177414 |
| AMPL7170373221 | chr5 | 112177717 | 112177836 |
| AMPL7170333377 | chr5 | 112177927 | 112178046 |
| AMPL7171868845 | chr5 | 112178226 | 112178354 |
| AMPL7157390263 | chr5 | 112178783 | 112178907 |
| AMPL7171902046 | chr5 | 112178896 | 112179017 |
| AMPL7160084437 | chr5 | 112179330 | 112179454 |
| AMPL7170331532 | chr5 | 131895024 | 131895124 |
| AMPL7171869422 | chr5 | 131911539 | 131911659 |
| AMPL7170331902 | chr5 | 131924329 | 131924456 |
| AMPL7171868901 | chr5 | 131925265 | 131925374 |
| AMPL7170336013 | chr5 | 131931389 | 131931511 |
| AMPL7170328702 | chr5 | 131944334 | 131944455 |
| AMPL7171868919 | chr5 | 131953784 | 131953889 |
| AMPL7170835541 | chr6 | 35423706  | 35423832  |
| AMPL7171366221 | chr6 | 35428285  | 35428413  |
| AMPL7170330552 | chr7 | 6022596   | 6022721   |
| AMPL7171894664 | chr7 | 6026452   | 6026577   |
| AMPL7170365694 | chr7 | 6026887   | 6027021   |
| AMPL7159075227 | chr7 | 6027035   | 6027164   |
| AMPL7171894628 | chr7 | 6027115   | 6027248   |
| AMPL7171902016 | chr7 | 6029421   | 6029520   |
| AMPL7170365803 | chr7 | 6029522   | 6029638   |
| AMPL7171828122 | chr7 | 6035146   | 6035246   |
| AMPL7171902080 | chr7 | 6035209   | 6035322   |
| AMPL7170331817 | chr7 | 6036889   | 6036999   |
| AMPL7164858338 | chr7 | 6038698   | 6038825   |
| AMPL7170333717 | chr7 | 6038775   | 6038889   |
| AMPL7170334660 | chr7 | 6042131   | 6042266   |
| AMPL7170088232 | chr7 | 6042204   | 6042305   |
| AMPL7170088986 | chr7 | 6043281   | 6043374   |
| AMPL7170333206 | chr7 | 6043536   | 6043657   |
| AMPL7170330659 | chr7 | 6043609   | 6043724   |

|                |      |           |           |
|----------------|------|-----------|-----------|
| AMPL7170330565 | chr7 | 6045479   | 6045594   |
| AMPL7170331042 | chr7 | 6045600   | 6045727   |
| AMPL7170118512 | chr7 | 140434377 | 140434494 |
| AMPL7170359467 | chr7 | 140434532 | 140434653 |
| AMPL7171902081 | chr7 | 140439595 | 140439716 |
| AMPL7170081580 | chr7 | 140439717 | 140439791 |
| AMPL7170360377 | chr7 | 140449040 | 140449162 |
| AMPL7170359652 | chr7 | 140449187 | 140449289 |
| AMPL7171208636 | chr7 | 140453054 | 140453172 |
| AMPL7170081632 | chr7 | 140453141 | 140453240 |
| AMPL7170359261 | chr7 | 140453952 | 140454075 |
| AMPL7171049748 | chr7 | 140476653 | 140476773 |
| AMPL7170944236 | chr7 | 140476787 | 140476882 |
| AMPL7170360403 | chr7 | 140477785 | 140477882 |
| AMPL7170422636 | chr7 | 140477824 | 140477940 |
| AMPL7170096617 | chr7 | 140481364 | 140481460 |
| AMPL7170359703 | chr7 | 140481392 | 140481515 |
| AMPL7170359932 | chr7 | 140482905 | 140483003 |
| AMPL7170420570 | chr7 | 140494252 | 140494366 |
| AMPL7170379969 | chr7 | 140501259 | 140501377 |
| AMPL7170421836 | chr7 | 140534383 | 140534502 |
| AMPL7170424778 | chr8 | 26196460  | 26196565  |
| AMPL7170424931 | chr8 | 26220140  | 26220261  |
| AMPL7171600342 | chr8 | 26220318  | 26220444  |
| AMPL7171869444 | chr8 | 30915896  | 30916015  |
| AMPL7170374195 | chr8 | 30924654  | 30924777  |
| AMPL7171869443 | chr8 | 30938339  | 30938462  |
| AMPL7171868871 | chr8 | 30938585  | 30938704  |
| AMPL7171869044 | chr8 | 30969167  | 30969287  |
| AMPL7170373885 | chr8 | 30977842  | 30977963  |
| AMPL7171049860 | chr8 | 38271113  | 38271221  |
| AMPL7170420507 | chr8 | 38271597  | 38271723  |
| AMPL7170360744 | chr8 | 38272264  | 38272356  |
| AMPL7171901973 | chr8 | 38274782  | 38274885  |
| AMPL7170252148 | chr8 | 38274866  | 38274953  |
| AMPL7171049679 | chr8 | 38274930  | 38275056  |
| AMPL7171404251 | chr8 | 38276987  | 38277107  |
| AMPL7171234762 | chr8 | 38279311  | 38279432  |
| AMPL7171049800 | chr8 | 38281751  | 38281877  |
| AMPL7170359931 | chr8 | 38283615  | 38283730  |
| AMPL7170201839 | chr8 | 38285849  | 38285947  |
| AMPL7170325799 | chr8 | 38285870  | 38285999  |
| AMPL7170359796 | chr8 | 38297813  | 38297924  |
| AMPL7170106044 | chr8 | 90949243  | 90949321  |
| AMPL7170813323 | chr8 | 90955430  | 90955557  |
| AMPL7170330164 | chr8 | 90960022  | 90960142  |
| AMPL7171891880 | chr8 | 90965561  | 90965683  |
| AMPL7171902108 | chr8 | 90965708  | 90965828  |
| AMPL7163020642 | chr8 | 90965849  | 90965961  |
| AMPL7171902002 | chr8 | 90970975  | 90971094  |

|                |      |          |          |
|----------------|------|----------|----------|
| AMPL7170332176 | chr8 | 90982521 | 90982636 |
| AMPL7170329541 | chr8 | 90983313 | 90983431 |
| AMPL7170365451 | chr8 | 90983411 | 90983504 |
| AMPL7171402333 | chr8 | 90992919 | 90993030 |
| AMPL7170107577 | chr8 | 90993563 | 90993647 |
| AMPL7170365302 | chr8 | 90993622 | 90993738 |
| AMPL7170331825 | chr8 | 90994919 | 90995047 |
| AMPL7160837073 | chr9 | 21971084 | 21971223 |
| AMPL7170330433 | chr9 | 21974754 | 21974894 |
| AMPL7170330820 | chr9 | 21994137 | 21994253 |
| AMPL7171869246 | chr9 | 35075651 | 35075758 |
| AMPL7162053769 | chr9 | 35075907 | 35076029 |
| AMPL7171891847 | chr9 | 35076352 | 35076452 |
| AMPL7170334025 | chr9 | 97873754 | 97873866 |
| AMPL7170331992 | chr9 | 97887342 | 97887466 |
| AMPL7170332179 | chr9 | 97897682 | 97897801 |
| AMPL7170332849 | chr9 | 97934366 | 97934476 |
| AMPL7171869333 | chrX | 14861776 | 14861901 |
| AMPL7171869453 | chrX | 14862774 | 14862893 |
| AMPL7169427003 | chrX | 14877351 | 14877463 |
| AMPL7171902059 | chrX | 14882906 | 14883032 |
| AMPL7171366357 | chrX | 14883225 | 14883346 |
| AMPL7171869012 | chrX | 66764907 | 66765041 |
| AMPL7171291690 | chrX | 66765458 | 66765586 |
| AMPL7171902082 | chrX | 66765911 | 66766022 |
| AMPL7170560676 | chrX | 66766432 | 66766565 |
| AMPL7171725622 | chrX | 66863037 | 66863161 |
| AMPL7170560663 | chrX | 66905815 | 66905939 |
| AMPL7170559978 | chrX | 66931137 | 66931258 |
| AMPL7170585068 | chrX | 66931238 | 66931358 |
| AMPL7170560701 | chrX | 66931437 | 66931551 |
| AMPL7170560393 | chrX | 66937284 | 66937413 |
| AMPL7170560055 | chrX | 66937368 | 66937485 |
| AMPL7171869508 | chrX | 66941670 | 66941791 |
| AMPL7171308532 | chrX | 66941746 | 66941868 |
| AMPL7170200880 | chrX | 66942612 | 66942712 |
| AMPL7171403455 | chrX | 66942737 | 66942861 |
| AMPL7170952694 | chrX | 66943456 | 66943560 |
| AMPL7171032892 | chrX | 66943527 | 66943649 |
| AMPL7170197272 | chrX | 76777844 | 76777941 |
| AMPL7171891912 | chrX | 76812891 | 76813013 |
| AMPL7171902096 | chrX | 76829758 | 76829879 |
| AMPL7170423528 | chrX | 76845392 | 76845492 |
| AMPL7170543898 | chrX | 76872120 | 76872237 |
| AMPL7170543314 | chrX | 76889080 | 76889199 |
| AMPL7170815021 | chrX | 76918742 | 76918852 |
| AMPL7171868887 | chrX | 76918841 | 76918966 |
| AMPL7170421029 | chrX | 76937571 | 76937688 |
| AMPL7171032488 | chrX | 76937672 | 76937788 |
| AMPL7171891894 | chrX | 76937990 | 76938117 |

AMPL7171225410 chrX

76938448

76938574
