# Supplementary material for: Investigation of Clinically Significant Molecular Aberrations in Patients with Prostate Cancer: Implications for Personalized Treatment, Prognosis and Genetic Testing
Source: MDPI journal article supplement (doi:10.3390/ijms241411834), 2023-07-23

## Supplemental Info

**Supplemental Table S1.** List of Genes covered by NIPD Genetics Prostate cancer assay.

| Single Nucleotide Variants / Insertions and Deletions                                                                                                            | Copy Number Alterations                                            | Rearrangements               |
|------------------------------------------------------------------------------------------------------------------------------------------------------------------|--------------------------------------------------------------------|------------------------------|
| AKT1, APC, AR, ATM, BARD1, BRAF, BRCA1, BRCA2, CTNNB1, CHEK2, FOXA1, MLH1, MSH2, MSH6, NRAS, PALB2, PIK3CA, PIK3CB, PMS2, POLE, PTEN, RAD51C, RAD51D, SPOP, TP53 | AR, ERBB2, FGFR1, FGFR2, FGFR3, MYC, MYCN, PIK3CA, PTEN, RB1, TP53 | NTRK1, NTRK2, NTRK3, TMPRSS2 |
| *Microsatellite Instability (MSI) testing included                                                                                                               |                                                                    |                              |

**Supplemental Table S2.** List of genomic coordinates covered by the Ampliseq panel (IAD207308\_231).

**Supplemental Table S3.** List of all the clinically significant variants and MSI-H results identified in the cohort.

**Supplemental Figure S1.** Sanger sequencing analysis on 5 patients with suspected pathogenic/likely pathogenic germline variants in HRR genes.

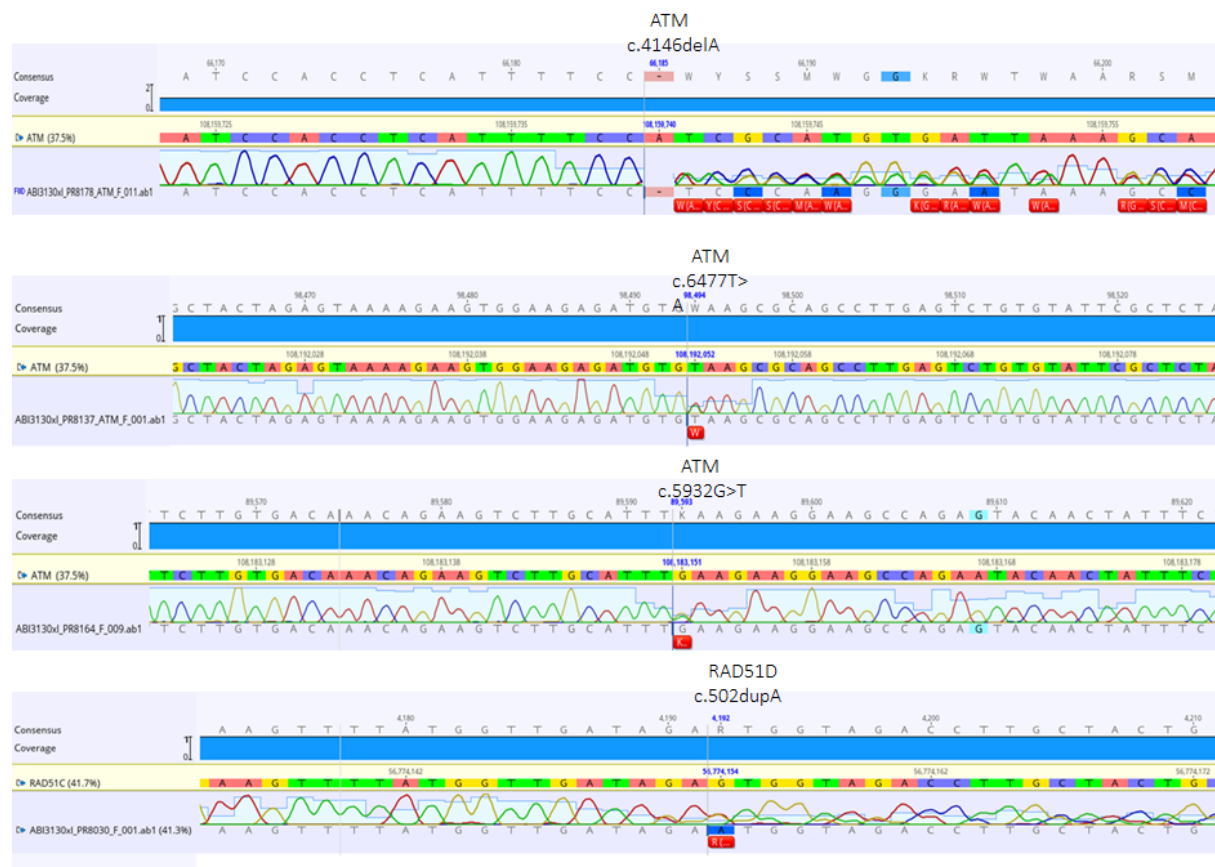

Supplement: s1 [file s1]
